# Supplementary material for: Dietary intake of Lycium ruthenicum Murray ethanol extract inhibits colonic inflammation in dextran sulfate sodium-induced murine experimental colitis
Source: Royal Society of Chemistry journal article supplement (doi:10.1039/d0fo00172d), 2020-01-01
Supplement: d0fo00172d1.pdf [file d0fo00172d1.pdf]

Table S1 Identification of individual compounds in LRE by UPLC-ESI-MS/MS.

| Peak | RT (min) | Type               | Compound identity                                           | Formula                                                       | Molecular Weight | Intenisy     |
|------|----------|--------------------|-------------------------------------------------------------|---------------------------------------------------------------|------------------|--------------|
| 1    | 0.19     | [M+H] <sup>+</sup> | N-Butylbenzenesulfonamide                                   | C <sub>12</sub> H <sub>12</sub> N <sub>2</sub> O <sub>2</sub> | 213.08           | 1172002.27   |
| 2    | 0.92     | [M-H] <sup>-</sup> | Galactonic acid                                             | C <sub>6</sub> H <sub>12</sub> O <sub>7</sub>                 | 196.06           | 85645350.66  |
| 3    | 0.97     | [M+H] <sup>+</sup> | Choline                                                     | C <sub>5</sub> H <sub>13</sub> NO                             | 103.10           | 59348954.48  |
| 4    | 1.03     | [M+H] <sup>+</sup> | Leucine                                                     | C <sub>6</sub> H <sub>13</sub> NO <sub>2</sub>                | 131.09           | 9119821.89   |
| 5    | 1.09     | [M-H] <sup>-</sup> | trans-Aconitic acid                                         | C <sub>6</sub> H <sub>6</sub> O <sub>6</sub>                  | 174.02           | 21508474.64  |
| 6    | 1.09     | [M+H] <sup>+</sup> | Betaine                                                     | C <sub>5</sub> H <sub>11</sub> NO <sub>2</sub>                | 117.08           | 409020222.08 |
| 7    | 1.11     | [M+H] <sup>+</sup> | Trigonelline                                                | C <sub>7</sub> H <sub>7</sub> NO <sub>2</sub>                 | 137.05           | 9855025.46   |
| 8    | 1.19     | [M+H] <sup>+</sup> | Muramic acid                                                | C <sub>9</sub> H <sub>17</sub> NO <sub>7</sub>                | 251.10           | 151044669.84 |
| 9    | 1.19     | [M-H] <sup>-</sup> | 2-Hydroxynicotinic acid                                     | C <sub>6</sub> H <sub>5</sub> NO <sub>3</sub>                 | 139.03           | 2691149.56   |
| 10   | 1.21     | [M+H] <sup>+</sup> | Pipecolic acid                                              | C <sub>6</sub> H <sub>11</sub> NO <sub>2</sub>                | 129.08           | 13199497.93  |
| 11   | 1.22     | [M+H] <sup>+</sup> | Pyridoxal                                                   | C <sub>8</sub> H <sub>9</sub> NO <sub>3</sub>                 | 167.06           | 5264616.03   |
| 12   | 1.28     | [M+H] <sup>+</sup> | 3-Hydroxy-2-methylpyridine                                  | C <sub>6</sub> H <sub>7</sub> NO                              | 109.05           | 5358662.57   |
| 13   | 1.30     | [M+H] <sup>+</sup> | 6-Hydroxynicotinic acid                                     | C <sub>6</sub> H <sub>5</sub> NO <sub>3</sub>                 | 139.03           | 12527400.20  |
| 14   | 1.41     | [M-H] <sup>-</sup> | Citric acid                                                 | C <sub>6</sub> H <sub>8</sub> O <sub>7</sub>                  | 192.03           | 670358791.44 |
| 15   | 1.42     | [M+H] <sup>+</sup> | L-Tyrosine                                                  | C <sub>9</sub> H <sub>11</sub> NO <sub>3</sub>                | 164.05           | 8880749.88   |
| 16   | 1.43     | [M+H] <sup>+</sup> | L-Pyroglutamic acid                                         | C <sub>5</sub> H <sub>7</sub> NO <sub>3</sub>                 | 129.04           | 9336644.04   |
| 17   | 1.57     | [M+H] <sup>+</sup> | L-Norleucine                                                | C <sub>6</sub> H <sub>13</sub> NO <sub>2</sub>                | 131.09           | 21930931.34  |
| 18   | 2.02     | [M+H] <sup>+</sup> | Phenacetin                                                  | C <sub>10</sub> H <sub>13</sub> NO <sub>2</sub>               | 179.09           | 5919964.63   |
| 19   | 2.74     | [M+H] <sup>+</sup> | L-Phenylalanine                                             | C <sub>9</sub> H <sub>11</sub> NO <sub>2</sub>                | 165.08           | 61439442.24  |
| 20   | 3.80     | [M-H] <sup>-</sup> | 2,3-Dihydroxybenzoic acid                                   | C <sub>7</sub> H <sub>6</sub> O <sub>4</sub>                  | 154.03           | 1582508.72   |
| 21   | 4.05     | [M+H] <sup>+</sup> | Methyl isonicotinate                                        | C <sub>7</sub> H <sub>7</sub> NO <sub>2</sub>                 | 137.05           | 2673578.69   |
| 22   | 4.64     | [M-H] <sup>-</sup> | Neochlorogenic acid                                         | C <sub>16</sub> H <sub>18</sub> O <sub>9</sub>                | 354.09           | 5555159.71   |
| 23   | 4.65     | [M+H] <sup>+</sup> | Ethyl levulinate                                            | C <sub>7</sub> H <sub>12</sub> O <sub>3</sub>                 | 144.08           | 470417.56    |
| 24   | 4.81     | [M-H] <sup>-</sup> | N-Acetylvaline                                              | C <sub>7</sub> H <sub>13</sub> NO <sub>3</sub>                | 159.09           | 1070307.37   |
| 25   | 5.30     | [M-H] <sup>-</sup> | 4-Acetyl-3-hydroxy-5-methylphenyl β-D-glucopyranoside       | C <sub>15</sub> H <sub>20</sub> O <sub>8</sub>                | 328.12           | 965620.31    |
| 26   | 5.31     | [M-H] <sup>-</sup> | 2-Isopropylmalic acid                                       | C <sub>7</sub> H <sub>12</sub> O <sub>5</sub>                 | 176.07           | 10114089.23  |
| 27   | 5.54     | [M-H] <sup>-</sup> | D-(-)-Quinic acid                                           | C <sub>7</sub> H <sub>12</sub> O <sub>6</sub>                 | 192.06           | 10194822.21  |
| 28   | 5.54     | [M-H] <sup>-</sup> | Chlorogenic acid                                            | C <sub>16</sub> H <sub>18</sub> O <sub>9</sub>                | 354.09           | 87595284.86  |
| 29   | 5.62     | [M+H] <sup>+</sup> | 2,3,4,9-Tetrahydro-1H-β-carboline-3-carboxylic acid         | C <sub>12</sub> H <sub>12</sub> N <sub>2</sub> O <sub>2</sub> | 216.09           | 12494620.88  |
| 30   | 5.63     | [M+H] <sup>+</sup> | 6-Methylquinoline                                           | C <sub>10</sub> H <sub>9</sub> N                              | 143.07           | 3417801.28   |
| 31   | 5.69     | [M-H] <sup>-</sup> | 3-[2-(β-D-Glucopyranosyloxy)-4-methoxyphenyl]propanoic acid | C <sub>16</sub> H <sub>22</sub> O <sub>9</sub>                | 358.13           | 1262407.67   |
| 32   | 5.85     | [M-H] <sup>-</sup> | Caffeic acid                                                | C <sub>9</sub> H <sub>8</sub> O <sub>4</sub>                  | 180.04           | 3618589.32   |
| 33   | 5.99     | [M-H] <sup>-</sup> | 4-Hydroxybenzaldehyde                                       | C <sub>7</sub> H <sub>6</sub> O <sub>2</sub>                  | 122.04           | 904384.78    |
| 34   | 6.23     | [M-H] <sup>-</sup> | 2-Hydroxycaproic acid                                       | C <sub>6</sub> H <sub>12</sub> O <sub>3</sub>                 | 132.08           | 8134946.52   |
| 35   | 6.42     | [M+H] <sup>+</sup> | 4-Hydroxyindole                                             | C <sub>8</sub> H <sub>7</sub> NO                              | 133.05           | 2430941.58   |
| 36   | 6.45     | [M-H] <sup>-</sup> | N-Acetyl-D-alloisoleucine                                   | C <sub>8</sub> H <sub>15</sub> NO <sub>3</sub>                | 173.10           | 769401.69    |
| 37   | 6.54     | [M+H] <sup>+</sup> | Pindone                                                     | C <sub>14</sub> H <sub>14</sub> O <sub>3</sub>                | 230.09           | 3382586.26   |

|    |      |                    |                                                                                                                   |                                                               |        |             |
|----|------|--------------------|-------------------------------------------------------------------------------------------------------------------|---------------------------------------------------------------|--------|-------------|
| 38 | 6.72 | [M+H] <sup>+</sup> | Paracetamol                                                                                                       | C <sub>8</sub> H <sub>9</sub> NO <sub>2</sub>                 | 151.06 | 5537206.10  |
| 39 | 6.90 | [M-H] <sup>-</sup> | 3-Coumaric acid                                                                                                   | C <sub>9</sub> H <sub>8</sub> O <sub>3</sub>                  | 164.05 | 15721221.35 |
| 40 | 6.91 | [M-H] <sup>-</sup> | (3R,5R)-1,3,5-Trihydroxy-4-<br>{(2E)-3-(4-hydroxy-3-methoxyphenyl)-2-propenoyl}oxy;cyclohexanecarboxylic acid     | C <sub>17</sub> H <sub>20</sub> O <sub>9</sub>                | 368.11 | 3075953.36  |
| 41 | 6.92 | [M-H] <sup>-</sup> | Naringin                                                                                                          | C <sub>27</sub> H <sub>32</sub> O <sub>14</sub>               | 580.18 | 2620848.14  |
| 42 | 6.96 | [M-H] <sup>-</sup> | N-Acetyl-L-phenylalanine                                                                                          | C <sub>11</sub> H <sub>13</sub> NO <sub>3</sub>               | 207.09 | 9139138.35  |
| 43 | 7.00 | [M-H] <sup>-</sup> | 3-Phenyllactic acid                                                                                               | C <sub>9</sub> H <sub>10</sub> O <sub>3</sub>                 | 166.06 | 3497024.61  |
| 44 | 7.14 | [M+H] <sup>+</sup> | Quercetin                                                                                                         | C <sub>15</sub> H <sub>10</sub> O <sub>7</sub>                | 302.04 | 915462.86   |
| 45 | 7.15 | [M-H] <sup>-</sup> | Rutin                                                                                                             | C <sub>27</sub> H <sub>30</sub> O <sub>16</sub>               | 610.15 | 13744493.83 |
| 46 | 7.19 | [M+H] <sup>+</sup> | Scopoletin                                                                                                        | C <sub>10</sub> H <sub>8</sub> O <sub>4</sub>                 | 192.04 | 4463608.19  |
| 47 | 7.25 | [M+H] <sup>+</sup> | Naringenin                                                                                                        | C <sub>15</sub> H <sub>12</sub> O <sub>5</sub>                | 272.07 | 4626324.65  |
| 48 | 7.26 | [M-H] <sup>-</sup> | 7-Hydroxy-2-(4-hydroxyphenyl)-4-oxo-3,4-dihydro-2H-chromen-5-yl β-D-glucopyranoside                               | C <sub>21</sub> H <sub>22</sub> O <sub>10</sub>               | 434.12 | 2849532.61  |
| 49 | 7.31 | [M+H] <sup>+</sup> | 2-Hydroxycinnamic acid                                                                                            | C <sub>9</sub> H <sub>8</sub> O <sub>3</sub>                  | 164.05 | 2871914.60  |
| 50 | 7.46 | [M-H] <sup>-</sup> | N-Acetyl-DL-tryptophan                                                                                            | C <sub>13</sub> H <sub>14</sub> N <sub>2</sub> O <sub>3</sub> | 246.10 | 12910878.79 |
| 51 | 7.46 | [M-H] <sup>-</sup> | DL-Tryptophan                                                                                                     | C <sub>11</sub> H <sub>12</sub> N <sub>2</sub> O <sub>2</sub> | 204.09 | 796522.38   |
| 52 | 7.50 | [M+H] <sup>+</sup> | N-Feruloyloctopamine                                                                                              | C <sub>18</sub> H <sub>19</sub> NO <sub>5</sub>               | 311.11 | 1890918.60  |
| 53 | 7.61 | [M+H] <sup>+</sup> | Kaempferol-3-O-β-glucopyranosyl-7-O-α-rhamnopyranoside                                                            | C <sub>27</sub> H <sub>30</sub> O <sub>15</sub>               | 594.16 | 4247917.64  |
| 54 | 7.67 | [M+H] <sup>+</sup> | Tiliroside                                                                                                        | C <sub>30</sub> H <sub>26</sub> O <sub>13</sub>               | 594.14 | 54069.66    |
| 55 | 7.69 | [M+H] <sup>+</sup> | 5,7-Dihydroxy-2-(4-hydroxy-3-methoxyphenyl)-4-oxo-4H-chromen-3-yl 6-O-(6-deoxy-α-L-mannopyranosyl) hexopyranoside | C <sub>28</sub> H <sub>32</sub> O <sub>16</sub>               | 624.17 | 2250284.46  |
| 56 | 8.24 | [M-H] <sup>-</sup> | Azelaic acid                                                                                                      | C <sub>9</sub> H <sub>16</sub> O <sub>4</sub>                 | 188.10 | 2487690.47  |
| 57 | 8.26 | [M-H] <sup>-</sup> | Salicylic acid                                                                                                    | C <sub>7</sub> H <sub>6</sub> O <sub>3</sub>                  | 138.03 | 8720660.40  |
| 58 | 8.28 | [M-H] <sup>-</sup> | 6-O-(3,4-Dihydroxy-2-methylenebutanoyl)-1-O-[(2E)-3-phenyl-2-propenoyl]-β-D-glucopyranose                         | C <sub>20</sub> H <sub>24</sub> O <sub>10</sub>               | 424.14 | 1176381.33  |
| 59 | 8.52 | [M+H] <sup>+</sup> | Prunin                                                                                                            | C <sub>21</sub> H <sub>22</sub> O <sub>10</sub>               | 434.12 | 1038964.74  |
| 60 | 8.61 | [M+H] <sup>+</sup> | Nootkatone                                                                                                        | C <sub>15</sub> H <sub>22</sub> O                             | 218.17 | 1048748.65  |
| 61 | 8.63 | [M+H] <sup>+</sup> | (2E)-3-(4-Hydroxyphenyl)-N-[2-(4-hydroxyphenyl)ethyl]acrylamide                                                   | C <sub>17</sub> H <sub>17</sub> NO <sub>3</sub>               | 283.12 | 2297119.58  |

|    |       |        |                                                                                                                                                                                                                            |                                                  |        |              |
|----|-------|--------|----------------------------------------------------------------------------------------------------------------------------------------------------------------------------------------------------------------------------|--------------------------------------------------|--------|--------------|
| 62 | 8.73  | [M-H]- | 2-(3,4-Dihydroxyphenyl)-5,7-dihydroxy-4-oxo-4H-chromen-3-yl 6-deoxy-2-O- $\{6\text{-O-}[(2\text{E})\text{-3-(4-hydroxyphenyl)-2-propenoyl]}\text{-}\beta\text{-D-glucopyranosyl}\}\text{-}\alpha\text{-L-glucopyranoside}$ | $\text{C}_{36}\text{H}_{36}\text{O}_{18}$        | 756.19 | 1151485.75   |
| 63 | 8.73  | [M+H]+ | 4-Phenylbutyric acid                                                                                                                                                                                                       | $\text{C}_{10}\text{H}_{12}\text{O}_2$           | 164.08 | 363670.67    |
| 64 | 8.95  | [M+H]+ | Butyl 4-aminobenzoate                                                                                                                                                                                                      | $\text{C}_{11}\text{H}_{15}\text{NO}_2$          | 193.11 | 4287056.81   |
| 65 | 9.04  | [M+H]+ | Ambrosic acid                                                                                                                                                                                                              | $\text{C}_{15}\text{H}_{20}\text{O}_4$           | 246.12 | 417597.54    |
| 66 | 9.13  | [M+H]+ | Indirubin                                                                                                                                                                                                                  | $\text{C}_{16}\text{H}_{10}\text{N}_2\text{O}_2$ | 262.07 | 1402842.20   |
| 67 | 9.50  | [M+H]+ | Zerumbone                                                                                                                                                                                                                  | $\text{C}_{15}\text{H}_{22}\text{O}$             | 218.17 | 1592275.72   |
| 68 | 9.76  | [M+H]+ | Dimethyl phthalate                                                                                                                                                                                                         | $\text{C}_{10}\text{H}_{10}\text{O}_4$           | 194.06 | 1338595.49   |
| 69 | 9.76  | [M+H]+ | 7-Hydroxycoumarin                                                                                                                                                                                                          | $\text{C}_9\text{H}_6\text{O}_3$                 | 162.03 | 5057359.75   |
| 70 | 9.81  | [M+H]+ | (4S,4aR)-4-[(3S)-3-Hydroxy-3-methylpent-4-enyl]-3,4a,8,8-tetramethyl-5,6,7,8a-tetrahydro-4H-naphthalen-1-one                                                                                                               | $\text{C}_{20}\text{H}_{32}\text{O}_2$           | 304.24 | 548852.58    |
| 71 | 9.83  | [M+H]+ | Nootkatone                                                                                                                                                                                                                 | $\text{C}_{15}\text{H}_{22}\text{O}$             | 218.17 | 789678.72    |
| 72 | 9.95  | [M+H]+ | Kaempferol                                                                                                                                                                                                                 | $\text{C}_{15}\text{H}_{10}\text{O}_6$           | 286.05 | 840503.91    |
| 73 | 10.06 | [M-H]- | Corchorifatty acid F                                                                                                                                                                                                       | $\text{C}_{18}\text{H}_{32}\text{O}_5$           | 328.22 | 128069353.05 |
| 74 | 10.06 | [M+H]+ | 9S,13R-12-Oxophytodienoic acid                                                                                                                                                                                             | $\text{C}_{18}\text{H}_{28}\text{O}_3$           | 292.20 | 29800861.90  |
| 75 | 10.06 | [M+H]+ | 19-Nortestosterone                                                                                                                                                                                                         | $\text{C}_{18}\text{H}_{26}\text{O}_2$           | 274.19 | 19637434.66  |
| 76 | 10.07 | [M+H]+ | Andrographolide                                                                                                                                                                                                            | $\text{C}_{20}\text{H}_{30}\text{O}_5$           | 350.21 | 2917731.89   |
| 77 | 10.08 | [M+H]+ | Ageratriol                                                                                                                                                                                                                 | $\text{C}_{15}\text{H}_{24}\text{O}_3$           | 234.16 | 2512513.95   |
| 78 | 10.24 | [M+H]+ | 3-(4-Methylbenzoyl)acrylic acid                                                                                                                                                                                            | $\text{C}_{11}\text{H}_{10}\text{O}_3$           | 190.06 | 1531644.60   |
| 79 | 10.51 | [M-H]- | (15Z)-9,12,13-Trihydroxy-15-octadecenoic acid                                                                                                                                                                              | $\text{C}_{18}\text{H}_{34}\text{O}_5$           | 330.24 | 149927018.10 |
| 80 | 10.51 | [M+H]+ | Sedanolid                                                                                                                                                                                                                  | $\text{C}_{12}\text{H}_{18}\text{O}_2$           | 194.13 | 4274829.45   |
| 81 | 10.51 | [M+H]+ | Methyl cinnamate                                                                                                                                                                                                           | $\text{C}_{10}\text{H}_{10}\text{O}_2$           | 162.07 | 1288162.99   |
| 82 | 10.83 | [M-H]- | Dodecanedioic acid                                                                                                                                                                                                         | $\text{C}_{12}\text{H}_{22}\text{O}_4$           | 230.15 | 248371.67    |
| 83 | 11.03 | [M+H]+ | Ciprostene                                                                                                                                                                                                                 | $\text{C}_{22}\text{H}_{36}\text{O}_4$           | 346.25 | 747053.98    |
| 84 | 11.10 | [M+H]+ | (-)-Caryophyllene oxide                                                                                                                                                                                                    | $\text{C}_{15}\text{H}_{24}\text{O}$             | 220.18 | 1841249.93   |
| 85 | 11.32 | [M+H]+ | N,N'-Dicyclohexylurea                                                                                                                                                                                                      | $\text{C}_{13}\text{H}_{24}\text{N}_2\text{O}$   | 224.19 | 2552337.10   |
| 86 | 11.49 | [M+H]+ | Methyl palmitate                                                                                                                                                                                                           | $\text{C}_{17}\text{H}_{34}\text{O}_2$           | 287.28 | 1316384.60   |
| 87 | 11.91 | [M+H]+ | Bis(methylbenzylidene)sorbitol                                                                                                                                                                                             | $\text{C}_{24}\text{H}_{30}\text{O}_6$           | 386.17 | 1861186.72   |
| 88 | 12.33 | [M+H]+ | 2-Amino-1,3,4-octadecanetriol                                                                                                                                                                                              | $\text{C}_{18}\text{H}_{39}\text{NO}_3$          | 317.29 | 3283623.32   |
| 89 | 12.36 | [M+H]+ | 9-Oxo-10(E),12(E)-octadecadienoic acid                                                                                                                                                                                     | $\text{C}_{18}\text{H}_{30}\text{O}_3$           | 294.22 | 3715265.11   |
| 90 | 12.82 | [M+H]+ | Bis(4-ethylbenzylidene)sorbitol                                                                                                                                                                                            | $\text{C}_{24}\text{H}_{30}\text{O}_6$           | 414.20 | 26545164.21  |
| 91 | 12.86 | [M+H]+ | 4-Ethoxy ethylbenzoate                                                                                                                                                                                                     | $\text{C}_{11}\text{H}_{14}\text{O}_3$           | 194.09 | 803784.93    |

|     |       |        |                                                                                       |                                                                |        |              |
|-----|-------|--------|---------------------------------------------------------------------------------------|----------------------------------------------------------------|--------|--------------|
| 92  | 13.34 | [M-H]- | Prostaglandin F1 $\alpha$                                                             | C <sub>20</sub> H <sub>36</sub> O <sub>5</sub>                 | 356.26 | 172460.92    |
| 93  | 13.66 | [M-H]- | Hexadecanedioic acid                                                                  | C <sub>16</sub> H <sub>30</sub> O <sub>4</sub>                 | 286.21 | 318572.79    |
| 94  | 13.72 | [M+H]+ | Cetrimonium                                                                           | C <sub>19</sub> H <sub>41</sub> N                              | 283.32 | 738105.57    |
| 95  | 13.92 | [M-H]- | 6:2 Fluorinated telomer sulfonate                                                     | C <sub>8</sub> H <sub>5</sub> F <sub>13</sub> O <sub>3</sub> S | 427.97 | 2276406.08   |
| 96  | 14.19 | [M-H]- | 13(S)-HpOTrE                                                                          | C <sub>18</sub> H <sub>30</sub> O <sub>4</sub>                 | 292.20 | 3106783.99   |
| 97  | 14.34 | [M+H]+ | 3,5-di-tert-Butyl-4-hydroxybenzaldehyde                                               | C <sub>15</sub> H <sub>22</sub> O <sub>2</sub>                 | 234.16 | 2229813.26   |
| 98  | 14.42 | [M-H]- | (+/-)12(13)-DiHOME                                                                    | C <sub>18</sub> H <sub>34</sub> O <sub>4</sub>                 | 296.24 | 12493041.66  |
| 99  | 14.66 | [M+H]+ | Dipropylene glycol dibenzoate                                                         | C <sub>20</sub> H <sub>22</sub> O <sub>5</sub>                 | 342.15 | 8445501.79   |
| 100 | 14.92 | [M+H]+ | 9-Oxo-10(E),12(E)-octadecadienoic acid                                                | C <sub>18</sub> H <sub>30</sub> O <sub>3</sub>                 | 294.22 | 75613488.99  |
| 101 | 15.02 | [M+H]+ | $\alpha$ -Linolenoyl ethanolamide                                                     | C <sub>20</sub> H <sub>35</sub> NO <sub>2</sub>                | 321.27 | 1468547.95   |
| 102 | 16.55 | [M-H]- | Ursolic acid                                                                          | C <sub>30</sub> H <sub>48</sub> O <sub>3</sub>                 | 456.36 | 1204337.93   |
| 103 | 16.59 | [M+H]+ | Palmitoyl ethanolamide                                                                | C <sub>18</sub> H <sub>37</sub> NO <sub>2</sub>                | 299.28 | 1580410.63   |
| 104 | 16.62 | [M+H]+ | Oleanolic acid                                                                        | C <sub>30</sub> H <sub>48</sub> O <sub>3</sub>                 | 438.35 | 3924280.18   |
| 105 | 16.70 | [M+H]+ | 17 $\alpha$ -Methyl-androstan-3-hydroxyimine-17 $\beta$ -ol                           | C <sub>20</sub> H <sub>33</sub> NO <sub>2</sub>                | 319.25 | 2065637.24   |
| 106 | 16.71 | [M+H]+ | $\alpha$ -Eleostearic acid                                                            | C <sub>18</sub> H <sub>30</sub> O <sub>2</sub>                 | 278.22 | 70425472.16  |
| 107 | 16.87 | [M-H]- | 16-Hydroxyhexadecanoic acid                                                           | C <sub>16</sub> H <sub>32</sub> O <sub>3</sub>                 | 272.24 | 69067631.93  |
| 108 | 16.87 | [M+H]+ | Oleoyl ethanolamide                                                                   | C <sub>20</sub> H <sub>39</sub> NO <sub>2</sub>                | 325.30 | 2273427.29   |
| 109 | 17.20 | [M-H]- | 2,2'-Methylenebis(4-methyl-6-tert-butylphenol)                                        | C <sub>23</sub> H <sub>32</sub> O <sub>2</sub>                 | 340.24 | 2859745.84   |
| 110 | 17.28 | [M+H]+ | Hexadecanamide e                                                                      | C <sub>16</sub> H <sub>33</sub> NO                             | 255.26 | 8673998.64   |
| 111 | 17.53 | [M+H]+ | Oleamide                                                                              | C <sub>18</sub> H <sub>35</sub> NO                             | 281.27 | 17007471.60  |
| 112 | 17.56 | [M+H]+ | 3-Methyl-5-(5,5,8a-trimethyl-2-methylene-7-oxodecahydro-1-naphthalenyl)pentyl acetate | C <sub>22</sub> H <sub>36</sub> O <sub>3</sub>                 | 348.27 | 5744994.03   |
| 113 | 17.56 | [M-H]- | Linoleic acid                                                                         | C <sub>18</sub> H <sub>32</sub> O <sub>2</sub>                 | 280.24 | 16739517.14  |
| 114 | 17.74 | [M+H]+ | Adrenic acid                                                                          | C <sub>22</sub> H <sub>36</sub> O <sub>2</sub>                 | 332.27 | 1425446.44   |
| 115 | 17.95 | [M+H]+ | 11(Z),14(Z),17(Z)-Eicosatrienoic acid                                                 | C <sub>20</sub> H <sub>34</sub> O <sub>2</sub>                 | 306.26 | 1072400.30   |
| 116 | 18.40 | [M-H]- | Ethyl myristate                                                                       | C <sub>16</sub> H <sub>32</sub> O <sub>2</sub>                 | 256.24 | 10008186.49  |
| 117 | 18.62 | [M+H]+ | 9(Z),11(E),13(E)-Octadecatrienoic Acid methyl ester                                   | C <sub>19</sub> H <sub>32</sub> O <sub>2</sub>                 | 292.24 | 2472141.21   |
| 118 | 18.66 | [M-H]- | Oleic acid                                                                            | C <sub>18</sub> H <sub>34</sub> O <sub>2</sub>                 | 282.26 | 17422186.94  |
| 119 | 18.72 | [M+H]+ | Docosatrienoic acid                                                                   | C <sub>22</sub> H <sub>38</sub> O <sub>2</sub>                 | 334.29 | 5568871.12   |
| 120 | 18.93 | [M+H]+ | Stearamide                                                                            | C <sub>18</sub> H <sub>37</sub> NO                             | 283.29 | 13855874.45  |
| 121 | 19.69 | [M+H]+ | Ethyl oleate                                                                          | C <sub>20</sub> H <sub>38</sub> O <sub>2</sub>                 | 310.29 | 4326779.49   |
| 122 | 19.70 | [M+H]+ | Muscone                                                                               | C <sub>16</sub> H <sub>30</sub> O                              | 238.23 | 8079249.78   |
| 123 | 19.95 | [M-H]- | Stearic acid                                                                          | C <sub>18</sub> H <sub>36</sub> O <sub>2</sub>                 | 284.27 | 2604083.99   |
| 124 | 20.72 | [M+H]+ | Erucamide                                                                             | C <sub>22</sub> H <sub>43</sub> NO                             | 320.31 | 325612273.98 |
| 125 | 22.24 | [M+H]+ | Docosanamide                                                                          | C <sub>22</sub> H <sub>45</sub> NO                             | 339.35 | 844072.84    |
| 126 | 24.82 | [M-H]- | Myristyl sulfate                                                                      | C <sub>14</sub> H <sub>30</sub> O <sub>4</sub> S               | 294.19 | 65962142.20  |

|     |       |        |                                   |                                                  |        |             |
|-----|-------|--------|-----------------------------------|--------------------------------------------------|--------|-------------|
| 127 | 26.26 | [M-H]- | 4-Dodecylbenzenesulfonic acid     | C <sub>18</sub> H <sub>30</sub> O <sub>3</sub> S | 326.19 | 73523620.14 |
| 128 | 27.15 | [M+H]+ | 1,3-Benzodioxolylbutanamine (BDB) | C <sub>11</sub> H <sub>15</sub> NO <sub>2</sub>  | 193.11 | 600530.48   |
| 129 | 27.44 | [M+H]+ | Arachidonoyl amide                | C <sub>20</sub> H <sub>33</sub> NO               | 303.26 | 603483.07   |

---

Table S2 Primary antibodies information

| Primary antibodies | Dilution ratio | Item number | Vendor        | Species |
|--------------------|----------------|-------------|---------------|---------|
| ZO-1               | 1: 1000        | ab96587     | Abcam         | Rabbit  |
| Occludin           | 1: 2000        | GB11149     | Proteintech   | Rabbit  |
| Claudin-1          | 1: 1000        | 13050-1-AP  | Proteintech   | Rabbit  |
| E-cadherin         | 1: 1000        | ab231303    | Abcam         | Mouse   |
| MLCK               | 1: 5000        | ab76092     | Abcam         | Rabbit  |
| p-MLCK             | 1: 1000        | ab200809    | Abcam         | Rabbit  |
| Claudin-3          | 1: 200         | 34-1700     | Thermo Fisher | Rabbit  |
| Claudin-7          | 1: 200         | 34-9100     | Thermo Fisher | Rabbit  |
| PPAR $\gamma$      | 1: 1000        | 16643-1-AP  | Proteintech   | Rabbit  |
| iNOS               | 1:100          | ab15323     | Abcam         | Rabbit  |
| COX-2              | 1: 1000        | GB11077-2   | Servicebio    | Rabbit  |
| p-I $\kappa$ B     | 1: 500         | 14220-1-AP  | Proteintech   | Rabbit  |
| NF- $\kappa$ B p65 | 1: 500         | ab16502     | Abcam         | Rabbit  |
| p-p65              | 1: 500         | 13346       | CST           | Mouse   |
| p-STAT3            | 1: 1000        | AP0070      | Abclonal      | Rabbit  |
| Ly6G               | 1: 1000        | GB11229     | Servicebio    | Rabbit  |
| F4/80              | 1:100          | ab15580     | Abcam         | Rabbit  |
| CD4                | 1: 1000        | GB11064     | Servicebio    | Rabbit  |
| IFN- $\gamma$      | 1: 1000        | MAB4851     | R&D Systems   | Mouse   |
| TLR4               | 1: 1000        | GB11519     | Servicebio    | Rabbit  |
| c-JUN              | 1: 1000        | ab40766     | Abcam         | Rabbit  |
| Caspase-1          | 1: 200         | ab1872      | Abcam         | Rabbit  |
| IL-1 $\beta$       | 1: 100         | ab9722      | Abcam         | Rabbit  |
| p-ERK              | 1: 1000        | ab201015    | Abcam         | Rabbit  |
| p-p38              | 1: 1000        | ab47363     | Abcam         | Rabbit  |

|                |         |          |            |        |
|----------------|---------|----------|------------|--------|
| p-JNK          | 1: 1000 | ab124956 | Abcam      | Rabbit |
| IL-17          | 1: 1000 | GB11110  | Servicebio | Rabbit |
| Foxp3          | 1: 1000 | GB11093  | Servicebio | Rabbit |
| ASC            | 1: 1000 | 67824    | CST        | Rabbit |
| NLRP3          | 1: 1000 | 15101    | CST        | Rabbit |
| $\beta$ -actin | 1: 3000 | GB12001  | Servicebio | Mouse  |

Table S3 Primers used in Quantitative RT- PCR (QRT-PCR).

| Gene name      | Forward primer 5'-3'  | Reverse primer 5'-3'   |
|----------------|-----------------------|------------------------|
| Muc2           | CGTCTGGTGGAAATGGTGGAG | GCACGGGCGTAGGAAGAAA    |
| RELM $\beta$   | CCTGTCTGCTGGGATGGTT   | GTGGCAAGTATTCCATTCCG   |
| $\beta$ -actin | GTGACGTTGACATCCGTAAGA | GTAACAGTCCGCCTAGAAGCAC |

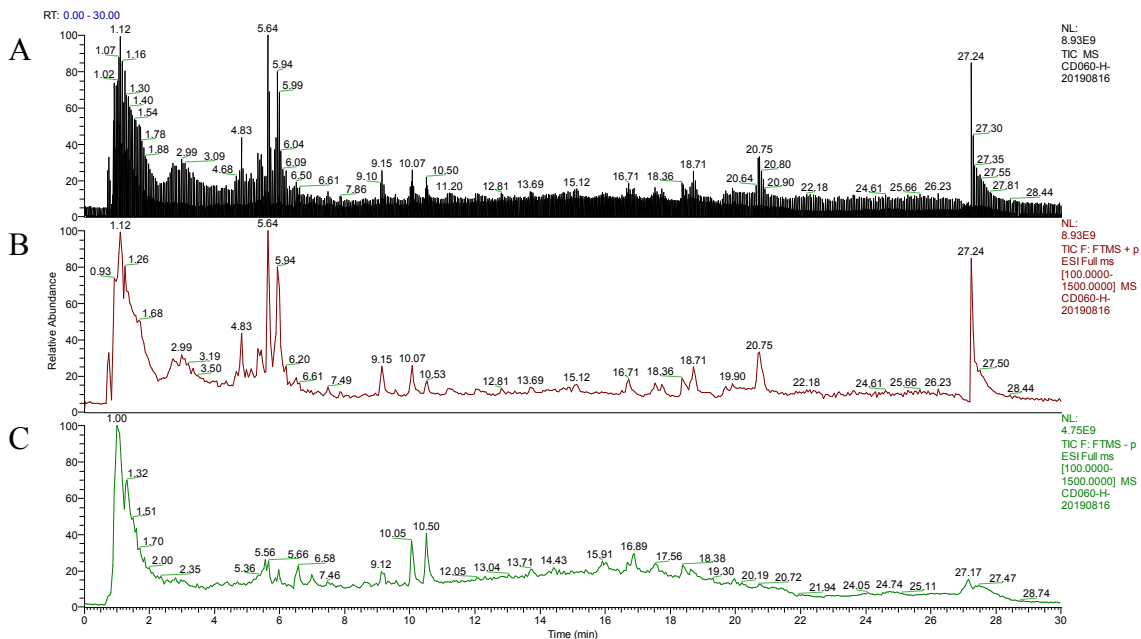

Figure S1. LC-ESI-MS/MS total ions chromatogram of LRE. (A) Total ions chromatogram, (B) positive ion mass spectrum, and (C) negative ion mass spectrum of LRE were displayed, respectively.
